# Supplementary material
Source: PubMed Central journal article supplement (PMC3979864)
Supplement: viru-5-378-s01.pdf [file viru-5-378-s01.pdf]

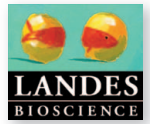

## Supplemental Material to:

Anke Gökçen, Andreas Vilcinskis, and Jochen Wiesner

Biofilm-degrading enzymes from *Lysobacter gummosus*

Virulence 2014; 5 (3)

<http://dx.doi.org/10.4161/viru.27919>

<http://www.landesbioscience.com/journals/virulence/article/27919/>

## $\alpha$ -Lytic proteases

Lgum1 1 MSVSKSRSRSFARASVFCVAVAVAALTSGAALAAAGEVSPALKFAMORDLGHFPCCQLAQQY  
 Lgum2 1 --MSLSQSARRACRRSLFLALASAASLVSGAAFAADSIDPRLQLAMORDLGHSAKQLPQY  
 Lgum3 1 -----MRKFSLSLTATVAMTVSGAALAAADDLAPGLKAAAMORDLGHSGTOVTFEY  
 Lgum4 1 -----MRKFSMSVLAATVAMTVSGAAFAADDLSPALKTAMORDLGHSSSTQLSOY  
 Lgum5 1 --MQSTGFSSRRSGAHVICALSLLCMVAFDAAAATDLQVSPTLHQAAQHDLGHSSAQVDQL  
 Lenz 1 -MYVSNHRSRRVARVSVSCLVAALAAAMSCGAALAADQVDPQLKFAMORDLGHFPCCQLPQY  
 LspA 1 -MSVSKSNARGFARASVFCVAVAATLSSGAFAADIVSPELKFAMORDLGHFPCCQLAQQY  
 LspB 1 -----MSVSKSNLRSRASLVAVAALASGSAMATDGNPTLKLAMORDLGHSSAQVAQM

Lgum1 61 LQTEKLAREQAASIEREFGGNFAGSWIERKDDGSFRVVAATAG--ARKSSTLGGVEVRNVR  
 Lgum2 59 LKTQSLSLRQASAKRALGSNFAGSWIERKADGSFGFVATSCTCKAARSLGGVEVRSVR  
 Lgum3 50 LKAERLAAQOEKAVEKQLGRNFAGAWLERKADGSFGFVAATT-SIKAAKAAAGIETROAR  
 Lgum4 50 LKVERLAEQOEKIVQAQLGRNFAGAWVERKADGSFGFVAAST-SIKNAKAAAGVETROAR  
 Lgum5 59 LQVQRDAPAEALARRRLGAHFVGGAWVERASDGRYRFVVGSSD-PRGPKLIDGVQIRQVR  
 Lenz 60 LQTEKLARTQAAAIEREFGGNFAGSWIERNEDGSFRLVAATSG--ARKSSTLGGVEVRNVR  
 LspA 60 LQTEKLARTQAAAIERDLGSLFAGSWIERNADGSFRLVAATAG--ARKASALGGVEVRSVR  
 LspB 55 VQADRILATTQEAALRRRLGSGFAGSWIERNDDGSFRVVAATSG--AQKSVAAAGVEVRHVR

Lgum1 120 HSLKRLQOSMDLLDAGAHARVKGVSKPLAGVQIHWYVDVRSNIVVVKVDEGATDAGIDFVA  
 Lgum2 119 HSLGQLENAFAALESQVRSRVAGVSKPLGGVHSWRIDPVINSVVVSLAPGATEDGVDFVA  
 Lgum3 109 HSLSALN----AAKQLDSQLARNGKAPKGVYSWAVDLPSNSVIVGVAPGAEDTAVDFVA  
 Lgum4 109 HSLAALN----SAKAQLDSLARSAPKGVYSWVVDLPSNSVVVGVAPGAEEACVDFVA  
 Lgum5 118 YSLSELEAAKARLDRSVRARVSGISRPIIDGVHSWYVDPGSNSVIVSVAPDAMERATDLAA  
 Lenz 119 YSLKQLQNSMAQLDAGANARVKGVSKPLDGVQSWYVDPNSNAVVKVDDGATEAVDFVA  
 LspA 119 HSLKQLQNSMAQLDAASNARVKGVSKPLDGVQSWYVDPVSNNAVVRVDQGAERAVDFVA  
 LspB 114 HSLKQLQNSMAALDRDARRRVPGLSKLRSVQSWYVDPITNSVVVSVAPGADEEAVDFVA

Lgum1 180 LSGADSGAVRIESAPGQLQTTANIVGGIEYSINN----TNLCSLGFVSVTRGATKGFVTAG  
 Lgum2 179 LSGADAGAVRFETDEGTPQLLANVIGGDQYLWEVTEG--YYPCSVGFVSVTKGETKGFVTAG  
 Lgum3 165 RSGLDITAVRFETMAEAPQRRIAIQGGRGYLRNPGDGYLYACSVGFVTKSTTPGFATAG  
 Lgum4 165 LSGLDARVRFETLNEAPQRRIAVQGGRGMLRDPGDGYLYACSVGFIVTKGSTTPGFATAG  
 Lgum5 178 VSGADSGLLRFQQTTPGVPQPTSSVYAGRSYKNG----ALSCSVGFVAVMQGATKGFVTAG  
 Lenz 179 LSGADSAQVRIEESPGKLQTTANIVGGIEYSINN----ASLCSVGFVSVTRGATKGFVTAG  
 LspA 179 VSGADAGAVRIEEVPGTLQTSVNVLGGIEYSINN----ATLCSVGFVSVTRGATKGFVTAG  
 LspB 174 VSGADISSIRVEEAVGTPQTTATVQGGIEYRMLPDLGRVGLCSVGFVTKGTIKGFATAG

▼ ▼  
 Lgum1 236 HCGTVNSIARIG-----GAQVGTFAGRVFPG-----NDRAWVSLTSAQTLLLRVWNG  
 Lgum2 238 HCGQVGRVVLGTG--DVEALVPLGTFTAVNHPG-----TDMAWVIVNPEHTLLGQVKDY  
 Lgum3 225 HCCNAGEVVYNEDSQWVPGVRLGAFAASTMPD--GNETGPDRCVWQVDSHTLSASVYGY  
 Lgum4 225 HCGTVGEIVYQEVSQWNPVVRVGTFSASTMETPSGSQTGPDRCVWVVDITHTLSPSVYGY  
 Lgum5 234 HCGTAGETIGLD-----GAPAGYFAASEFPG-----TDRAWVALNANHELFPPLITNY  
 Lenz 235 HCGTVNATARIG-----GAVVGTFAARVFPG-----NDRAWVSLTSAQTLLLRVWANG  
 LspA 235 HCGGVGAIVRIG-----GTQVGSFAARVFPG-----NDRAWVSVGSAHTLQGAVSNY  
 LspB 234 HCAKAGQSVQIS-----GVNVGTFTTASHFPN-----TDRAWVITGAAHTLLGSVITNY

Lgum1 283 SS-YVTVRGSAAEAAVGAAVCRSGRTTGYRCGTITAKNVTANYAEG-----TVRGLTIAN  
 Lgum2 289 ADGLLSVKGSVEAPVGAALCRSGRTTGYKCGTIRAKNVSVRVCFDR-----YVGMETETN  
 Lgum3 283 GSGDVTVHGSTEAAVGGALCRSGRTSGWRCCGAIRTKNVTVSYVDDTGQPDGTVTGLTQTT  
 Lgum4 285 GNGDVTVVRGSTEAAVGAALCRSGRTSGWHCCGAIRSKNNTVSYVDDAGNPDGTVTGLTRTS  
 Lgum5 281 AGCFFAVRGSVEAGYSAVVCRSGWKTGYQCGLITANQNVTVNSTRG-----VVFGLTQSN  
 Lenz 282 SS-FVTVRGSAAEAAVGAAVCRSGRTTGYRCGTITAKNVTANYAEG-----AVRGLTQGN  
 LspA 282 SGGTIAIRGSAAEAAVGAAVCRSGRTTGYRCGNITAKNVTANYAEG-----AVRGLTQGN  
 LspB 281 TCGSVAVKGSVEAAVGAAVCRSGRTTGYKCGTITAKNVTVNYCTLG-----TVRGLTIAN

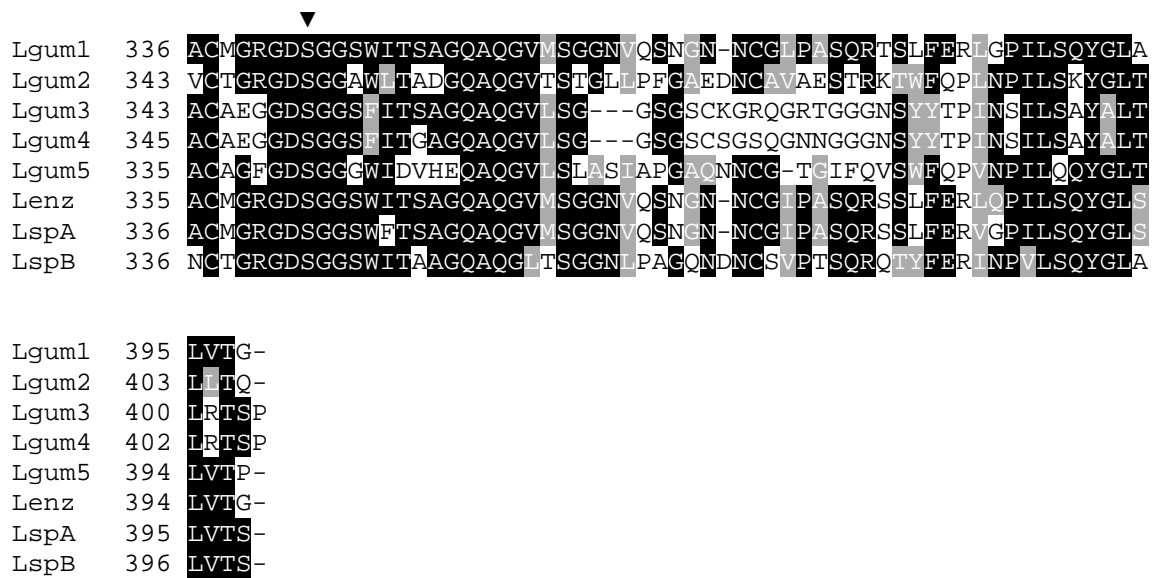

**Figure S1.** Sequence alignment of  $\alpha$ -lytic proteases.

Predicted signal peptides are shown in red. Prodomains reported in published work are shown in orange. The residues constituting the catalytic triad are marked with arrowheads. Signal peptides were predicted with SignalP (<http://www.cbs.dtu.dk/services/SignalP/>). The alignment was generated with ClustalW (<http://www.ch.embnet.org/software/ClustalW.html>) and edited with BoxShade ([http://www.ch.embnet.org/software/BOX\\_form.html](http://www.ch.embnet.org/software/BOX_form.html)).

- Lgum1, *L. gummosus* isoform 1 (GenBank accession no. KF738067);
- Lgum2, *L. gummosus* isoform 2 (GenBank accession no. KF738068);
- Lgum3, *L. gummosus* isoform 3 (GenBank accession no. KF738069);
- Lgum4, *L. gummosus* isoform 4 (GenBank accession no. KF738070);
- Lgum5, *L. gummosus* isoform 5 (GenBank accession no. KF738071);
- Lenz, *L. enzymogenes* (GenBank accession no. AAA74111);
- LspA, *Lysobacter* sp. XL1 (GenBank accession no. ACZ72924);
- LspB, *Lysobacter* sp. XL1 (GenBank accession no. ACZ72925).

## β-Lytic metalloendopeptidases

|      |     |                                                                |
|------|-----|----------------------------------------------------------------|
| Lgum | 1   | -----MGLAALLTCCVLAATISGGAGAAERGLSCQ-----                       |
| Lenz | 1   | -----                                                          |
| Lsp  | 1   | -----MKKISKAGLGLALMCALATIGGNASAQGHGLSSE-----                   |
| Alyt | 1   | -----MKKISKAGLGLALVCALATIGGNAARR-ATAQRR-----                   |
| Paer | 1   | MQHKRSRAMASPRSPFLFVLLALAVGGTANAHHDDGLPFRYSAELLGQLQLPSVALPLND   |
|      |     |                                                                |
| Lgum | 29  | DLVYSYDEMFDIDAYLAKNAPHLSRHAESISHWAGYSGISPKVLIALMEQQSGAITRR     |
| Lenz | 1   | -----                                                          |
| Lsp  | 35  | DLVYSYDEMFDIDAYLAKHAPHLRKHSEESHWAGYSGISPKVLIALMEQQSGANS--      |
| Alyt | 34  | GSGVFDYDEMFDIDAHHLAKHAPHLRKHSEESHWAGYSGISRSVDRADGAAERAVTP--    |
| Paer | 61  | DLFLYGRDAEAFDLEAYLAVNAPALNDKSEYLEHWSGYYSINPKVLIITLMVMQSGPLG--  |
|      |     |                                                                |
| Lgum | 89  | HAAADAARPFGCALAQAKDFNGQTRVVAQALREALYENDGPDAGCAVT-----VAR       |
| Lenz | 1   | -----                                                          |
| Lsp  | 93  | --AKRATNRPFGLARADGFGQTRVVALALRESLYERFPDGAAGPVT-----LAR         |
| Alyt | 92  | --SARRIVRSASWRAPTASARRPARSRWCASRCTSAIPTRQAGDAG-----PRQ         |
| Paer | 119 | APDERALAAPLGRLSAKRGFDHQVRIVLQQLSRRYYGFREYQLHQAAARKAVGEDGLNAA   |
|      |     |                                                                |
| Lgum | 140 | ANPLQALFERAGASQASAKLSGDGEFQLVYGRLEFNEPRQAQAPSAR--FAKAGPDVQPLIS |
| Lenz | 1   | -----S                                                         |
| Lsp  | 142 | ANPLQALFERSQDNPEAANLRGDGEFQLVYGRLEFNEPRQKAASDR--FAKAGPDVQPLIS  |
| Alyt | 141 | SAAGAVRAFRRQRAGGRARRRRRVPAGLRPPVQRTAPGQNGFG--P--LRQRRPGRAAIS   |
| Paer | 179 | SAALLLILLREGAKASRVQGNPLGVAQTRQLRFGTAAEELLQPRNRVARQLQAKAALAP    |
|      |     |                                                                |
| Lgum | 198 | PNGLLQFPFRGARWHVGGHAHTNTGSGNYPMSSLDMSLGGGWGSNQSNWVSASANG--SF   |
| Lenz | 2   | PNGLLQFPFRGASWHVGGHAHTNTGSGNYPMSSLDMSRGG--GSNQNGNWVSASAAGGSF   |
| Lsp  | 200 | PNGLLQFPFRGASWHVGGHAHTNTGSGNYPMSSLDMSRGGGWGSNQNGNWVSASAAG--SF  |
| Alyt | 197 | PNGLLQFPFRGASWHVGGHAHTNTGSGNYPMSSLDMSRGGGWGSNQNGNWVSASAAG--SF  |
| Paer | 239 | PSNLMQLPWRQGYSWQPNGAHSNTGSG-YPYSSFDASVDWPRWGSATYSVVAAHAG--TV   |
|      |     |                                                                |
| Lgum | 257 | KRHSSCFAEIVHSGGWSTTYHLMNIRYNTGANVGSNTAIANPANTRAQALCNGGSSSTGP   |
| Lenz | 60  | KRHSSCFAEIVHTGGWSTTYHLMNIQYNTGANVSMNTAIANAPNTQAQALCNGGQSTGP    |
| Lsp  | 259 | KRHSSCFAEIVHTGGWSTTYHLMNIQYNTGANVSMNTAIANPANTQAQALCNGGQSTGP    |
| Alyt | 256 | KRHSSCFAEIVHTGGWSTTYHLMNIQYNTGANVSMNTAIANPANTQAQALCNGGQSTGP    |
| Paer | 296 | RVLSRCQVRVTHPSGWATNYHHMDQIQVSNQQVVSADTKLGVYAGNINTALCEGGSSSTGP  |
|      |     |                                                                |
| ▼ ▼  |     |                                                                |
| Lgum | 317 | HEHWSLKLNGSFYHLNGAYLSGYRITATGNSYDTNCSRFLYAKN--GQNYCSG--WFTNPG  |
| Lenz | 120 | HQHWSLKLQNGSFYHLNGTYLSGYRITATGSSYDTNCSRFLYTKN--GQNYCYG--YYVNPG |
| Lsp  | 319 | HEHWSLKLQNGSFYHLNGTYLSGYRITATGSSYDTNCSRFLYTKN--GQNYCYG--YYVNPG |
| Alyt | 316 | HEHWSLKLQNGSFYHLNGTYLSGYRITATGSSYDTNCSRFLYTKN--GQNYCYG--YYVNPG |
| Paer | 356 | HLHFSLLYNGAFVSLQGASFGPYRINVGTSNYDNDCRRYFYNYCSAGTTHCAFRPLYNPG   |
|      |     |                                                                |
| Lgum | 374 | H--                                                            |
| Lenz | 177 | PN-                                                            |
| Lsp  | 376 | PN-                                                            |
| Alyt | 373 | PN-                                                            |
| Paer | 416 | LAL                                                            |

**Figure S2.** (previous page) Sequence alignment of  $\beta$ -lytic metalloendopeptidases.

Predicted signal peptides are shown in red. Prodomains reported in published work are shown in orange. SignalP did not identify a single peptide in the *L. gummosus* sequence. The residues binding the catalytic zinc ion are marked with an arrowhead.

Lgum, *L. gummosus* (GenBank accession no. KF738072);

Lenz, *L. enzymogenes* (GenBank accession no. P00801);

Lsp, *Lysobacter* sp. IB-9374 (GenBank accession no. BAB86844);

Alyt, *Achromobacte lyticus* (GenBank accession no. AAA21906);

Paer, *Pseudomonas aeruginosa* staphylolysin/LasA (GenBank accession no. AAC12656).

For the  $\beta$ -lytic metalloendopeptidase from *L. enzymogenes*, only the sequence of the mature enzyme determined by direct protein sequencing is available.

# Lysyl endopeptidases

Lgum\_Lep1 1 ----MKRLYGSLALLSLSIGAAIACPTILPAAFDPHPNVSPIIDKIALRTMPAVDVEKLLKAQ  
 Lgum\_Lep2 1 ----MKRICGSLLLLGLSISAALAAPASRPAAFDHNNLSSVDKIAVRMPAVDVAKLKAE  
 Lgum\_Lep3 1 ----MKRFTLTLGLLALSIGTAIAGPALRPAAFDNARTSRIDRIALRSMPAVDVAKLRAE  
 Alyt\_API 1 ----MKRICGSLLLLGLSISAALAAPASRPAAFDYANLSSVDKIALRTMPAVDVAKAKAE  
 Lsp\_LepA 1 ----MKRICGSLLLLGLSISAALAAPASRPAAFDYANLSSVDKIALRTMPAVDVAKAKAE  
 Lsp\_LepB 1 ----MKRITLTLGLLALSIGSALAAPALRPAAFDHARLARVDRIALRVMPAVDVAKLRAE  
 Lenz\_27796 1 ----MKRICGSLLLLGLSISAALAAPASRPAAFDHNNLSSVDKIAVRMPAVDVAKLKAE  
 Lenz\_LysC 1 -----  
 Paer\_PIV 1 MHKRTYLNACLVLALAAGASQALAAPMASEMAGDVAVLQASPASTGHARFANPNAAISAA

Lgum\_Lep1 57 DRLRDKR--GDIPRFAPPMIVDMTPLNSGVWED-LDADHVVWRQVRVSE-----  
 Lgum\_Lep2 57 DLLRDKR--GDIPRFAPPIKVDMTPLNSGVWED-LDADNVVWRQVRVSE-----  
 Lgum\_Lep3 57 DVQRAAR--REVPRFATALPLNIDTLTSGTWED-LDADHVVWRTRVLESK-----  
 Alyt\_API 57 DLQRDKR--GDIPRFALADVDMTPQNSGAWWEYTDNQFANWRQVRVSE-----  
 Lsp\_LepA 57 DLQRDKR--GDIPRFALADVDMTPQNSGAWWEYTDNQFANWRQVRVSE-----  
 Lsp\_LepB 57 DVKRNAR--NEVPRFATALAVDIDTLKDGAWED-LDADTAVWRTRVLESK-----  
 Lenz\_27796 57 DVLRDKR--GDIPRFAPPIKVDMTPLNSGVWED-LDADNVVWRQVRVSE-----  
 Lenz\_LysC 1 -----  
 Paer\_PIV 61 GIHFAAPPARRVARAAPLAPKPGTPLLVGVGLKTATPEIDETTLEWIDTPDGRHTARFPI

Lgum\_Lep1 103 KAMSLNFGFTQYYMPAGGRMLIYPATQTKCGDRELIREYTDNRDNNEMSQLWTAIVPGQEA  
 Lgum\_Lep2 103 KALSlnFGFTQYHMPQGGRLLVYPATQAAGDRNLISEYTDARDNNAQGLWTAIVPGQEA  
 Lgum\_Lep3 103 NALTLNFHFTQFKLPAGARMLIYPADQTPSSSANFVRSFTSADNADGQLWTPVVIGDEA  
 Alyt\_API 104 KALSlnFGFTDYMPAGGRMLIYPATQAPAGDRGLISQYDASNNNSARQLWTAIVVPGAEA  
 Lsp\_LepA 104 KALSlnFGFTDYMPAGGRMLIYPATQAPAGDRGLISQYDASNNNSARQLWTAIVVPGAEA  
 Lsp\_LepB 103 DALSLNFHFDKFKLPEGARMLIYPADQAPSAAGRVRSEFTSADNNAFGELWTPVVVGEEA  
 Lenz\_27796 103 KALSlnFGFTQYHMPQGGRLLVYPATQAAGDRNLISEYTDARDNNAQGLWTAIVPGQEA  
 Lenz\_LysC 1 -----  
 Paer\_PIV 121 SAAGAASLRAAIRLETHSGSLPDDVLLHFAGAGKEIFEASGKDLVSNRPYVWVPEGDTL

Lgum\_Lep1 163 VIEVVVPRASVGLKLRRLTKINHDYVGFGLARRMAQASGEKGTSGICNVDVVCPEGNGR  
 Lgum\_Lep2 163 VIEVVVPRAKLGELKRLKLGQVGHYDVGFGPLARRMAAASGEKGVSGQCNVDVVCPEGDGR  
 Lgum\_Lep3 163 VIEVVVPRAKAGELKRLGVEVNDYVGIKRLAR-DAALDQAKGVSGSCNIDVVCPEGNGH  
 Alyt\_API 164 VIEAVIPRDKVGEFKLRRLTEVNHDYVGFGLARRMAAASGEKGVSGSCNIDVVCPEGDGR  
 Lsp\_LepA 164 VIEAVIPRDKVGEFKLRRLTEVNHDYVGFGLARRMAAASGEKGVSGSCNIDVVCPEGDGR  
 Lsp\_LepB 163 VIEVVVPRAKLGELKRLKLGQVGHYDVGFGKLVKRGVQQQAGTKAASGSCNIDVVCPEGNGY  
 Lenz\_27796 163 VIEVVVPRAKLGELKRLKLGQVGHYDVGFGPLARRMAAASGEKGVSGQCNVDVVCPEGDGR  
 Lenz\_LysC 1 -----GVSGSCNIDVVCPEGNGH  
 Paer\_PIV 181 TVEIVIPAN----LQPGDLRLSVPQVSYFADSLYKACYRDGFGASGSCNIDVVCPEGNGT

Lgum\_Lep1 223 RDIIRSVGVYS-----KNGSLACTGSLVNNTANNKKMYFLTAHHCGMTTAAANISIV  
 Lgum\_Lep2 223 RDIIRSVAAYS-----KNGSLACTGSLVNNTANDKKMYFLTANHCGMTTASTAASIV  
 Lgum\_Lep3 222 RDIIRSVAAYS-----KQGTWVCTGSLVNNSANDKKMYFLTANHCGMTTAAIASSIV  
 Alyt\_API 224 RDIIRAVGAYS-----KSGTLACTGSLVNNTANDKKMYFLTAHHCGMTTASTAASIV  
 Lsp\_LepA 224 RDIIRAVGAYS-----KSGTLACTGSLVNNTANDKKMYFLTANHCGMTTASTAASIV  
 Lsp\_LepB 223 RDIIRAVGAYS-----KQGTWVCTGSLVNNTANDKKMYFLTANHCGMTTASVNNISIV  
 Lenz\_27796 223 RDIIRSVAAYS-----KSGSLACTGSLVNNTANDKKMYFLTANHCGMTTASTAASIV  
 Lenz\_LysC 19 RDIIRSVAAYS-----KQGTWVCTGSLVNNSANDKKMYFLTANHCGMTTAAIASSIV  
 Paer\_PIV 237 RAYDNATAAVAKMVFTSSADGGSYICTGILNNGNSPKRQLFWSAAHC-IEDQATAAIIQ



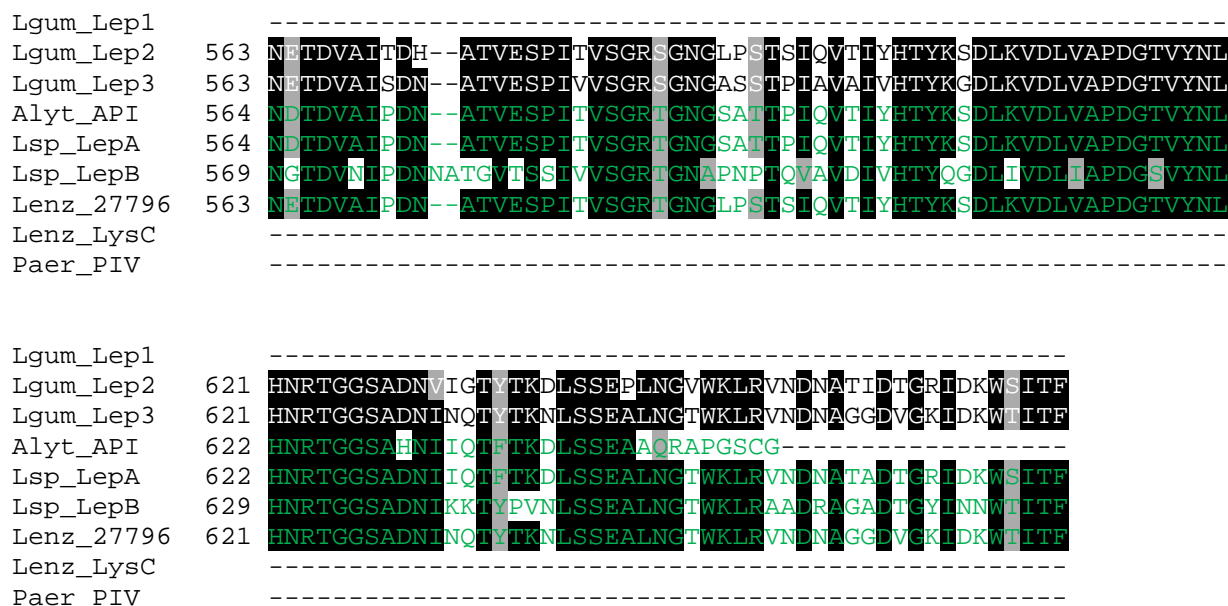

**Figure S3.** Sequence alignment of lysyl endopeptidases.

Predicted signal peptides are shown in red. Prodomains and C-terminal extension domains reported in published work are shown in orange and green, respectively. The residues constituting the catalytic triad are marked with arrowheads.

Lgum1, *L. gummosus* isoform 1 (GenBank accession no. KF738073);

Lgum2, *L. gummosus* isoform 2 (GenBank accession no. KF738074);

Lgum3, *L. gummosus* isoform 3 (GenBank accession no. KF738075);

Alyt\_API, *Achromobacter lyticus* Achromobacter protease I (GenBank accession no. P15636);

Lsp\_LepA, *Lysobacter sp. IB-9374* LepA (GenBank accession no. BAB32450);

Lsp\_LepB, *Lysobacter sp. IB-9374* LepB (GenBank accession no. BAC22111);

Lenz\_27796, *L. enzymogenes* ATCC 27796 (Kuhlman et al. 2009, Ref. 52);

Lenz\_LysC, *L. enzymogenes* Lys-C (GenBank accession no. Q7M135);

Paer\_PIV, *Pseudomonas aeruginosa* protease IV (GenBank accession no. Q7M135).

For the of lysyl endopeptidases Lys-C from *L. enzymogenes*, only the sequence of the mature enzyme determined by direct protein sequencing is available.





```

Lgum  530  DTDFAINDNSTVDSPIITVSGRTGNAPTNAQVSVNI IHTYRGDLKVDLVAPDGS SLYNLSNR
Vcho  515  KGKPIITGLSGSRGGEDFYFTFTVINS GSVVVSISGGITGDADLYVKAGSKPTTSSWDCRPYR
Vvul  514  NNTPVSNLTGNKGSQVFYFTFTVDRNATAVVSISGGSGDADLYLKAGSKPTTSSWDCRPYR
Paer  -----

Lgum  590  AGGSADNLTGTFTFNLSSEPLNGTWKLRVNDNANADVGRIDTWSITF
Vcho  575  SGNAEQCSISAVVGTTYHVMIRGYSNYSGVTLRLD-----
Vvul  574  YGNNEQCSVSAAPGTTYHVMIRGYSNYSGVRLKIQY-----
Paer  -----

```

**Figure S4.** Sequence alignment of M4 family metalloproteinases.

Predicted signal peptides are shown in red. Prodomains and C-terminal extension domains reported in published work are shown in orange and green, respectively. The residues binding the catalytic zinc ion are marked with arrowheads.

Lgum, *L. gummosus* (GenBank accession no. KF738078);

Vcho, *Vibrio cholera* hemagglutinin/protease (GenBank accession no. ZP\_06942058);

Vvul, *Vibrio vulnificus* metalloprotease (GenBank accession no. AF102028);

Paer, *Pseudomonas aeruginosa* elastase (GenBank accession no. AFM37281).

```

Lgum_Lep2  572  HATVESPITVSGRSGNGLPSTSIQVTTIYHTYKSDLKVDLVAPDGTVYNIHNRTGGSadNV
Lgum_HAP   538  NSTVDSPIITVSGRTGNAPTNAQVSVNI IHTYRGDLKVDLVAPDGS SLYNLSNRAGGSADNL

Lgum_Lep2  632  IGTYTKDLSSEPLNGVWKL RVNDNATIDTGRIDKWSITF
Lgum_HAP   598  TGTFTFNLSSEPLNGTWKLRVNDNANADVGRIDTWSITF

```

**Figure S5.** Comparison of the C-terminal extension domains from *L. gummosus* lysyl endopeptidase isoform 2 (Lgum\_Lep2) and the *L. gummosus* hemagglutinin/protease homolog (Lgum\_HAP).

# OmpA-like proteins

Ecol 1 -MKKTAIAIAVALAGFATVAQAAPKDNTWYTGAKLGWSQYHDTGFIN----N---NGPTH  
 Sent 1 -MKKTAIAIAVALAGFATVAQAAPKDNTWYAGAKLGWSQYHDTGFIH----N---DGPTH  
 Eaer 1 -MKKTAIAIAVALAGFATVAQAAPKDNTWYAGGKLGWSQHDTGMYNSNLNN---NGPTH  
 Smar 1 -MKKTAIALAVALAGFATVAQAAPKDNTWYTGAKLGWSQYHDTGYGNGYQNGIGNGPTH  
 Lgum1 1 MNKKLLCAALLGGLSIAQVASAQDFDDRWWYITCAAGMNIQDNDRGTR-----NAPFG  
 Lgum2 1 ----MLSTALLAGLAFSQAASAQDFDDRWWYVTGAVGMNIQDNDRGTR-----NAPFG

Ecol 53 ENQLGAGAFGGYQVNPYVGFEMGYDWLGRMPYKGSVENGAYKAQGVQLTAKLGYPITDDL  
 Sent 53 ENQLGAGAFGGYQVNPYVGFEMGYDWLGRMPYKGDNINGAYKAQGVQLTAKLGYPITDDL  
 Eaer 57 ESQLGAGAFGGYQVNPYLGFEMGYDWLGRMPYKGVKVNAGAFSSQAVQLTAKLGYPITDDL  
 Smar 60 KDQLGAGAFGLGYQANQYLGFEIIGYDWLGRMPYKGSVNINGAFKAQGVQLAAKLSTYPIADDL  
 Lgum1 53 AIGLGKFLNKNWSLDGELNYQN-----PKFDDNODANWSQYGLSLDLRHRHVTDGRN  
 Lgum2 49 AIGLGKFLNKNWSLDGELNYQN-----PKFDDNODANWSQYGLSLDLRHRHVTDGRN

Ecol 113 DVYTRLGGMVWRADTKSNVYG----KNHDTGVSPVFAGGVEYAITPEIATRLEYQWVNN  
 Sent 113 DVYTRLGGMVWRADTKSNVPGG-PSTKDHDTGVSPVFAGGTEYAITPEIATRLEYQWVNN  
 Eaer 117 DIYTRLGGMVWRADSSNSIAG----DNHDTGVSPVFAGGVEAMTRDIATRLEYQWVNN  
 Smar 120 DIYTRLGGMVWRADSKANYGRTGQRLSDHDTGVSPVLAAGVVEYALTKNWATRLIYQVFSN  
 Lgum1 105 WNPYILMGLGYQRSEEEYLLPSVLSVSPGNRKDGNLAAKVGVGIQCDLGRVGIIRTELAYRAD  
 Lgum2 101 WNPYILMGLGYQRSEEEYLLPSVLSVSPGNRKDGNLAAKVGVGIQCDLGRVGIIRTELAYRAD

Ecol 168 IGDAAHTIGTRPDNGMLSLGVSYRFGQGEAAPVVAPAPAPAPEVQTKHFTLKSD-----  
 Sent 172 IGDANTIGTRPDNGILSLVGVSYRFGQGEAAPVVAPAPAPAPEVQTKHFTLKSD-----  
 Eaer 172 IGDAGTVGVRPDNGMLSVGVSYRFGQEDNAPVVAPAPAPAPEVITKHTFTLKSD-----  
 Smar 180 IGDAGTVGARPDNTMLSLGVSYRFGQDD-VVAPAPAPAPAPEVETKHTFTLKSD-----  
 Lgum1 165 FDDTSVAAPQEDWFGDVLASVGIVIPLGPEPVAAVAPAPVVEQGCADKDDDDGQGVNCCDD  
 Lgum2 161 FDDTSVAAPQEDWFGDVLASVGIVIPLGPEPVAAVAPAPVVEQGCADKDDDDGQGVNCCDD

Ecol 221 -----VLFTFNKATLKPEGQAALDQLYSQLSNIDPKDGS  
 Sent 225 -----VLFNFNKSTLKPPEGQAALDQLYSQLSNIDPKDGS  
 Eaer 225 -----VLFNFNKATLKPEGQAALDQLYTSQLSNIDPKDGS  
 Smar 232 -----VLFNFNKSTLKAPEGQAALDQLYTSQLSNIDPKDGS  
 Lgum1 225 KCPGSQAGQTIGPDGCAVPVTIDLKGVNFDKATLRPDVAVSILNEAAEILKRYP--DLK  
 Lgum2 221 KCPGSQAGQTIGPDGCPVPSIDLKGVNFDKATLRPDSVAAILNEAAEILKRNPP--SLR

Ecol 255 VVVLGYTDTRIGSDAYNQALSERRAQSVVDYLIISKGIPADKIS-ARGMGESNPVTGNTCDN  
 Sent 259 VVVLGFTDRIGSDAYNQGLSEKRAQSVVDYLIISKGIPSDKIS-ARGMGESNPVTGNTCDN  
 Eaer 259 AVVLGYTDTRIGSEQYNQKLSEKRAQSVVDYLVAKGIPANKIS-ARGMGESDPVTGNTCDN  
 Smar 266 VVVLGYTDAVGSQYNQKLSEQRAQSVVDYLVMSKGIPSDKIS-ARGMGESADAVTGNTCGY  
 Lgum1 283 VEVAGHTDLCKGDIYNQKLSERRAKAAYDYLIISNGVDAGRLTGPVGYGESRPLESTPQTF  
 Lgum2 279 VEVAGHTDLCKGDAYNQKLSERRAKAVDYLIISNGVDAGRLTGPVGYGESRPLESTPQTF

Ecol 314 --VKQRAALIDCLAPDRRVEIEVKGIKDVVTQPQA  
 Sent 318 --VKPRAALIDCLAPDRRVEIEVKGVKDVVTQPQA  
 Eaer 318 --VKARAALIDCLAPDRRVAIEVKGKDVVTQPQA  
 Smar 325 KSGRATKAQIAACLAPDRRVEIEVKGIKDVVTQPQA  
 Lgum1 343 PACKS-----EKNRRTEINVAQN-----  
 Lgum2 339 PACKS-----EKNRRTEINAQN-----

**Figure S6.** (previous page) Sequence alignment of OmpA-like proteins.

Predicted signal peptides are shown in red.

Ecol, *Escherichia coli* (GenBank accession no. ABJ00366);

Sent, *Salmonella enterica* serovar Typhimurium (GenBank accession no. ABJ00366);

Eaer, *Enterobacter aerogenes* (GenBank accession no. P09146);

Smar, *Serratia marcescens* (GenBank accession no. AGE17540);

Lgum1, *L. gummosus* isoform 1 (GenBank accession no. KF738076);

Lgum2, *L. gummosus* isoform 2 (GenBank accession no. KF738077).

Violet bars indicate the transmembrane  $\beta$ -strands of the *E. coli* OmpA determined by X-ray diffraction (Pautsch and Schulz, 1998). Blue bars show the putative transmembrane  $\beta$ -strands of the *L. gummosus* proteins predicted with TMBETA-NET (<http://psfs.cbrc.jp/tmbeta-net/>).

## **$\alpha$ -Lytic protease**

MSVSKSRRRSFARASVFCVAVAVAALTSGAALAAAGEVSPALKFAMQRDLGIFPGQIAQYLQTEKLAREQAASIE  
REFGGNFAGSWIERKDDGSFRVVAATAGARKSSTLGGVEVRNVRHSLKRLQQSMDLLDAGAHARVKGVSKPLAGV  
QTWYVDVRSNTVVVKVDEGATDAGIDFVALSGADSGAVRIESAPGQLQTTANIIIGGIEYSINNTNLCSIGFSVTR  
GATKGFVTAGHCGTVNSIARIIGGAQVGTFAGRVFPGNDRWVSLTSAQTLPRVVNGSSYVTVRGSAAEAVGAAV  
CRSGRTTGYRCGTITAKNVTANYAEGTVRGLTNANACMGRGDSGGSWITSAGQAQGVMSGGNVQSNGNCCGLPAS  
QRTSLFERLGPILSQYGLALVTG

## **$\beta$ -Lytic metalloendopeptidase**

MGLALLTCCVLAAISGGAGAAERGLSGQDLVYSYDEMDFDFDIDAYLAKNAPHLRHAESISHWAGYSGISPKVLI  
ALMEQQSGAITRRHAAADAARKPFGALAQAKDFNGQTRVQAQALREALYENDGPDAGAVTVARANPLQALFERA  
GASQASAKLSGDGEFQLVYGRFLFNEPRQAQAPSARFAKAGPDVQPLSPNGLLQFPFPRGARWHVGAHTNTGSGN  
YPMSSLDMSLGGGWSNQSNVTWVSASANGSFKRHSSCFAEIVHSGGWSTTYHLMNIRYNTGANVGSNTAIANPA  
NTRAQALCNGGSSTGPEHWSLKLNGSFYHLNGAYLSGYRITATGNSYDTNCSRFLYLAKNGQNYCSGWFTNPGH

## **Lysyl endopeptidase 1**

MKRLYGLALLLSLSIGAAIAGPTTLPAAFDHPNVSPIDKIALRTMPAVDVEKLLKAQDRLRDKRGDIPRFAFPMTV  
DMTPLNSGVWEDLDADHVVRQRVRSDKAMSLNFGFTQYYMPAGGRMLIYPATQTKGGDRELIREYTDNRNEMS  
QLWTAIVPGQEAVIEVVVPRASVQQLKRLTKINHDYVGFGLARRMAQASGEKGTSGICNVDVVCPDGNRRDI  
IRSVGVYSKNGSLACTGSLVNNTANNKKMYFLTAHHCGMTTAAAANSIVVYWNYQNSTCRPPNTAINGTDGDGLL  
NQSQSGSVVRATSANSDFTLLELRTAANPAFNLFWAGWDRRNQNFPSAIGIHPNVAEKRISLSVSPTSFFVAWGG  
GAGTTHLNVQWQPTGGVTEPGSSGSPLYSPEKRVIGQLHGGPSSCSATGNSRSDQYGRVFTSWTGGGTAATRLSN  
WLDPGATGATFINGIN

## **Lysyl endopeptidase 2**

MKRICGSLLLLGLSISAALAAPASRPAAFDHNNISSVDKIAVRAMPVAVAKLKAEDLLRDKRGDIPRFAFPKIV  
DMTPLNSGVWEDLDADNVIWRQRVRSEKALSLNFGFTQYHMPQGGRLLVYPATQAAAGDRNLISEYARDNNAQG  
QLWTAIVPGQEAVIEVVVPRAKLGELKLLKLGQVGHYVGFGLARRLAAASGEKGVSGQCNVDVCPDGDGRRDI  
IRSVAAYSKNGSLACTGSLVNNTANDKKMYFLTANHCGMTTASTAASIVVYWNYQNSTCRAPNTPASGANGDGM  
SQNQSGSTVKASYADSDFTLLELNNTAANPAFNLYWAGWDRRDQNFSSAIAIHPNVAEKRISLSTSPTSFFVAWGG  
GAGTTHLNVQWQPTGGVTEPGSSGSPLYSPEKRVIGQLHGGPSSCSATGTNRSDQYGRVFTSWTGGGTASTRLSN  
WLDAGNTGAQFIDGLDSSGGTPTNTPPVANFTSTTSGLTATFTDTSTDSGDTIASRSWNFGDGTSTATNPTKTY  
AAGTYTTLTVDNNGATHTKTGSVTVSGTPGSQTYTNETDVAITDHATVESPI TVSGRSGNGLPSTSIQVTIYH  
TYKSDLKVDLVAPDGTVYNLHNRTGGSADNVI GTYTKDLSSEPLNGVWKL RVNDNATIDTGRIDKWSITF

## **Hemagglutinin/proteinase**

VNRNVSPTALS FALS LVLASGAAGAAQRVDLHGQDI AKLNQQYKAAVAKSGAAAKANVRHAELISLDADSSLTQI  
KSSQDANGTRNYRYQQSFRGVPVFGHEVVVSEDAQGNVRTLFRGSRVAGLAAELPATAPKLSAQALNLAKSAAALG  
KRLGALQVRNNESSKQMIYIDDNGRAHMAVYVNYFADAPKGGEPTRPFVILDANS GKVLKQWEGLNHALVGTGPGG  
NTKTGQYEGTDFGFNDVAQSGSTCTMNNTNVKTVNLNHGTSGTTAFSYTCPRNTVKAINGAFSPLNDAHVFYFKV  
VFDMYSYVGVAPLTFQLSMRVHYSNSYENAFWDGSAMTFGDGATRFYPLVSLDVSASHEVSHGFTEQQSGLVYSG  
QSGGINEAYS DIAGEAAEFYMN GTNDFLVGAQIFKASGALRYMANPPQDGRSIGHASNYTSGMDVHYSSGVYNKA  
FYTLATKAGWDTVKAFKVFVAKANKDYWTPSTDFNNGACGVETSATDLGFAKADVTAASFVVGVTCP TGPFGPGPT  
KYTNDTDFAINDNSTVDSPI TVSGRTGNAPTNAQVSVNI IHTYRGDLKVDLVAPDGSGLYINISNRAGGSADNLTGT  
FTFNLSSEPLNGTWKLRVNDNANADVGRIDTWSITF

## **OmpA-like protein 1**

MNKKLLCAALLGGLSIAQVASAQDFDDRWYITGAAGMNIQDNDRGTRNAPFGAIGLGKFLNKNWSLDGELNYQNP  
KFDDNQDANWSQYGISLDLRRHFVTDGRNWNPIILMGLGYQRSEEEYLLPSVLSPGNRKDGNLAAKVGVIQGD  
LGRVIRTELAYRADFDSDTSVAAPQEDWFGDVLASVGI VIPLGPEPVAAPVVEQGCADKDDDDGDGVNCCDDK  
CPGSAQQTIGPDGCAVPVTIDLKGVNFDKATLRPDAVSI LNEAAEILKRYPDLKVEVAGHTDLCKGKDTYNQK  
LSERRAKAAYDYLTSNGVDAGRLTGPVGYGESRPLESTPQTFFPACKSEKNRRTELNVQN

## **OmpA-like protein 2**

MLSTALLAGLAFSQAASAQDFDDRWYVTGAVGMNIQDNDRGTRNAPFGAIGLGKFLNKNWSLDGELNYQNPKFDD  
NQDANWSQYGISLDLRRHFVTDGRNWNPIILMGLGYQRSEEEYLLPSVLSPGNRKDGNLAAKVGVIQGD  
LGRVIRTELAYRADFDSDTSVAAPQEDWFGDVLASVGI VIPLGPEPVAAPVVEQGCADKDDDDGDGVNCCDDK  
CPGSAQQTIGPDGCPVPSIDLKGVNFDKATLRPDSVAI LNEAAEILKRNPSLRVEVAGHTDLCKGDAYNQKLSER  
RAKAVYDFLTSNGVDAGRLAGPIGYGESRPLESTPQTFFPACKSEKNRRTELNAQN

**Figure S7.** (previous page) Domain architecture of *L. gummosus* proteins that co-purified with biofilm-degrading activity. Predicted signal peptides, prodomains and C-terminal extension domains are marked in red, orange and green, respectively. Sequences confirmed by peptide mass fingerprinting are underlined.

**Table S1.** *L. gummosus* proteins identified by peptide mass fingerprinting<sup>a</sup>

| Predicted protein                | Accession no. | Band 1          | Band 2 | Band 3 | Fract. 8 | Fract. 17 | Best blast hit (tblastn) | Best blast hit (blastp) |
|----------------------------------|---------------|-----------------|--------|--------|----------|-----------|--------------------------|-------------------------|
| Alpha-lytic protease             | KF738067      | nd <sup>b</sup> | 832    | 596    | 2292     | 598       | DQ888610                 | ABI54136                |
| Beta-lytic metallo-endopeptidase | KF738072      | nd              | 245    | 51     | 1147     | 291       | AB079667                 | BAB86844                |
| Lysyl endopeptidase 1            | KF738073      | nd              | nd     | nd     | 389      | 60        | J05128                   | P15636                  |
| Lysyl endopeptidase 2            | KF738074      | 32              | nd     | nd     | 229      | 253       | AB045676                 | BAB32450                |
| Hemagglutinin/proteinase         | KF738078      | 545             | 51     | nd     | 43       | 479       | EU333168                 | ACA34431                |
| OmpA-like protein 1              | KF738076      | 93              | 88     | 586    | 87       | 20        | HQ399464                 | WP_008399696            |
| OmpA-like protein 2              | KF738077      | 93              | 88     | 419    | 88       | 20        | HQ399464                 | WP_008399696            |
| Metallo-peptidase, family M72    | KF738080      | nd              | nd     | nd     | 189      | nd        | CP002986                 | WP_017907847            |
| Glycoside hydrolase, family 16   | KF738079      | nd              | nd     | nd     | 128      | nd        | CP002047                 | YP_004968129            |
| Serine peptidase, family S1      | KF738081      | nd              | nd     | nd     | 93       | nd        | CP000155                 | WP_018693635            |
| Serine peptidase, family S8      | KF738082      | nd              | nd     | nd     | 89       | nd        | AB299027                 | BAF49606                |
| Serine peptidase, family S8      | KF738083      | nd              | nd     | nd     | 66       | nd        | AC182716                 | YP_003376995            |

<sup>a</sup> Mascot scores are indicated for the proteins identified in the bands 1, 2 and 3 digested in-gel, as well as ProPac SAX-10 fractions 8 and 17 digested in solution, according to Fig 2. All proteins identified with Mascot scores >40 in at least one of the samples are listed.

<sup>b</sup> nd, not detected
